# Supplementary material for: Highly selective arylhydrazone based “ON–OFF” fluorescent chemosensors for Zn2+ion, inhibitors for KB cell, 4LRH cancer protein and DFT studies
Source: Royal Society of Chemistry journal article supplement (doi:10.1039/c4ra10831k), 2014-12-02
Supplement: c4ra10831k1.pdf [file c4ra10831k1.pdf]

## Supporting Information

**A highly selective arylhydrazone based “ON–OFF” fluorescent chemosensor for Zn<sup>2+</sup> ion in aqueous ethanol and their Molecular Docking, Cytotoxicity and DFT studies.**

**Annamalai Subhasri and Chinnadurai Anbuselvan\***

*Department of Chemistry, Annamalai University, Annamalainagar – 608 002, India*

*Corresponding author email: [cas\\_amu@yahoo.co.in](mailto:cas_amu@yahoo.co.in)*

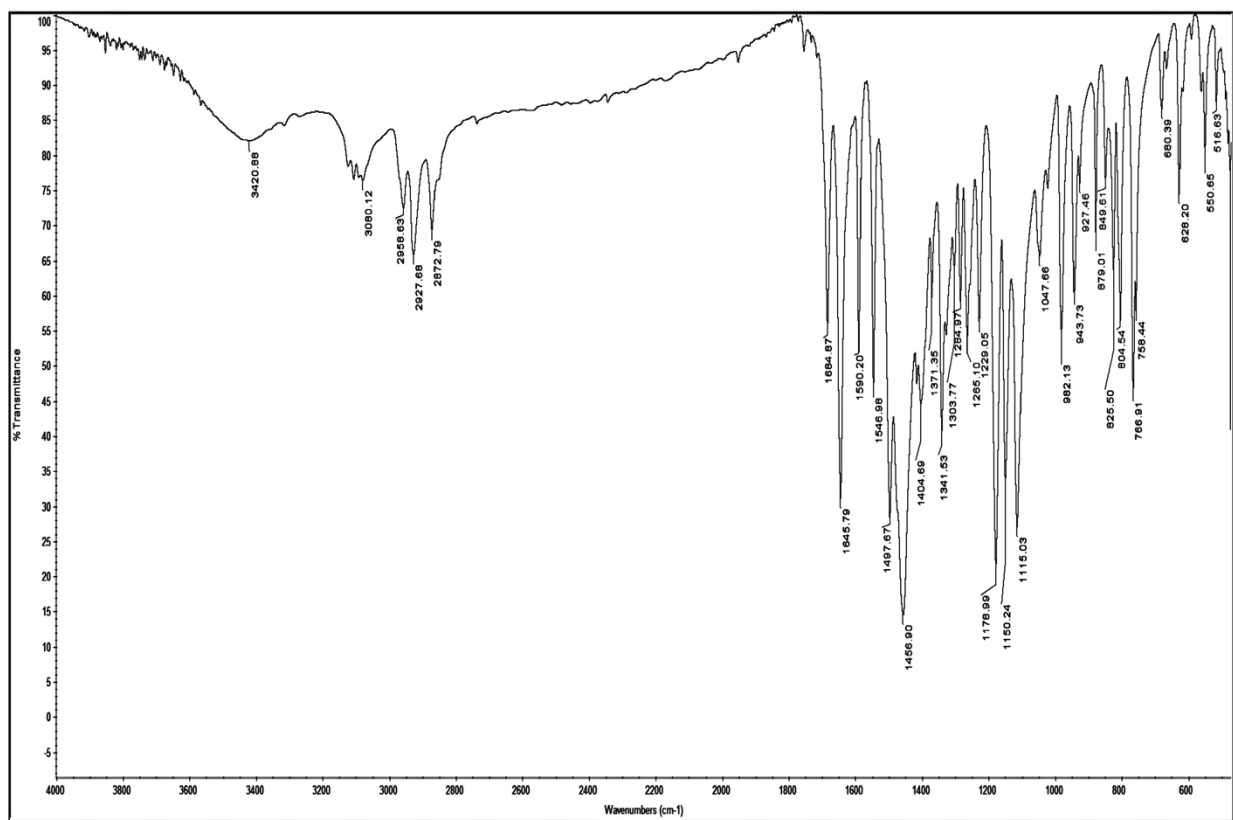

Fig. S1 IR spectra of compound (1).

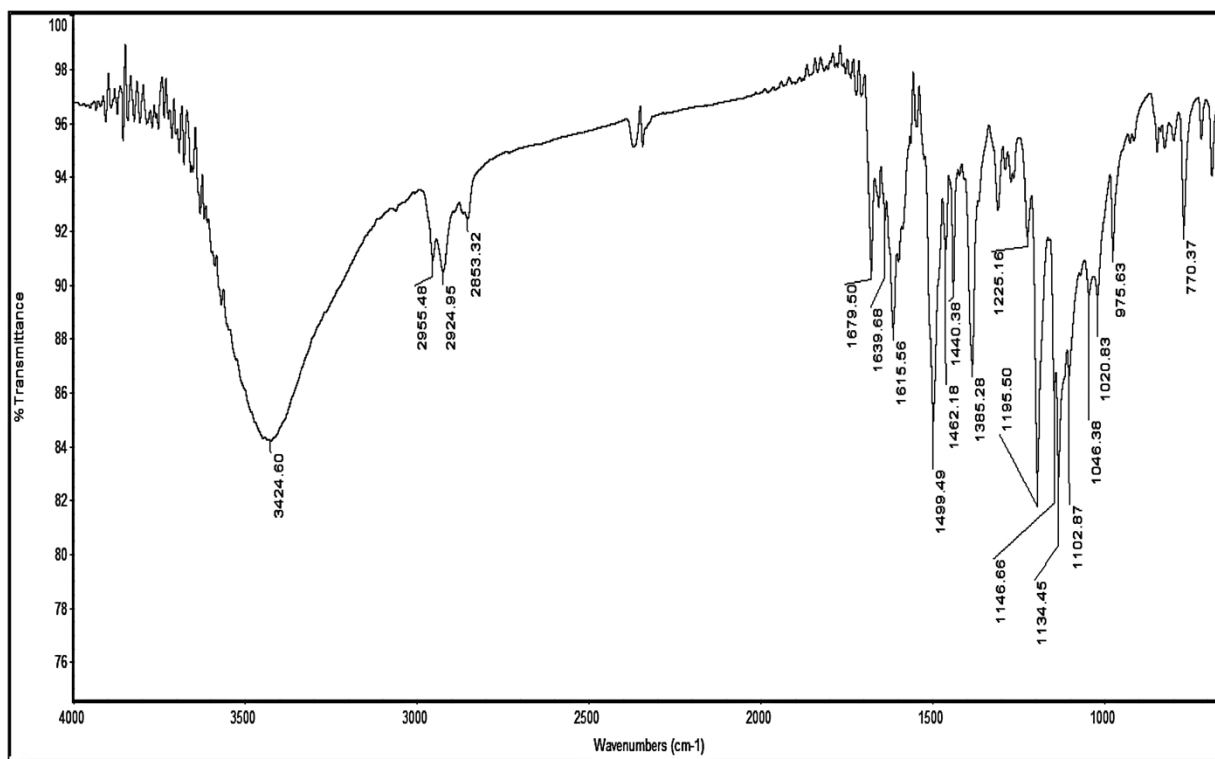

**Fig. S2** IR spectra of compound (2).

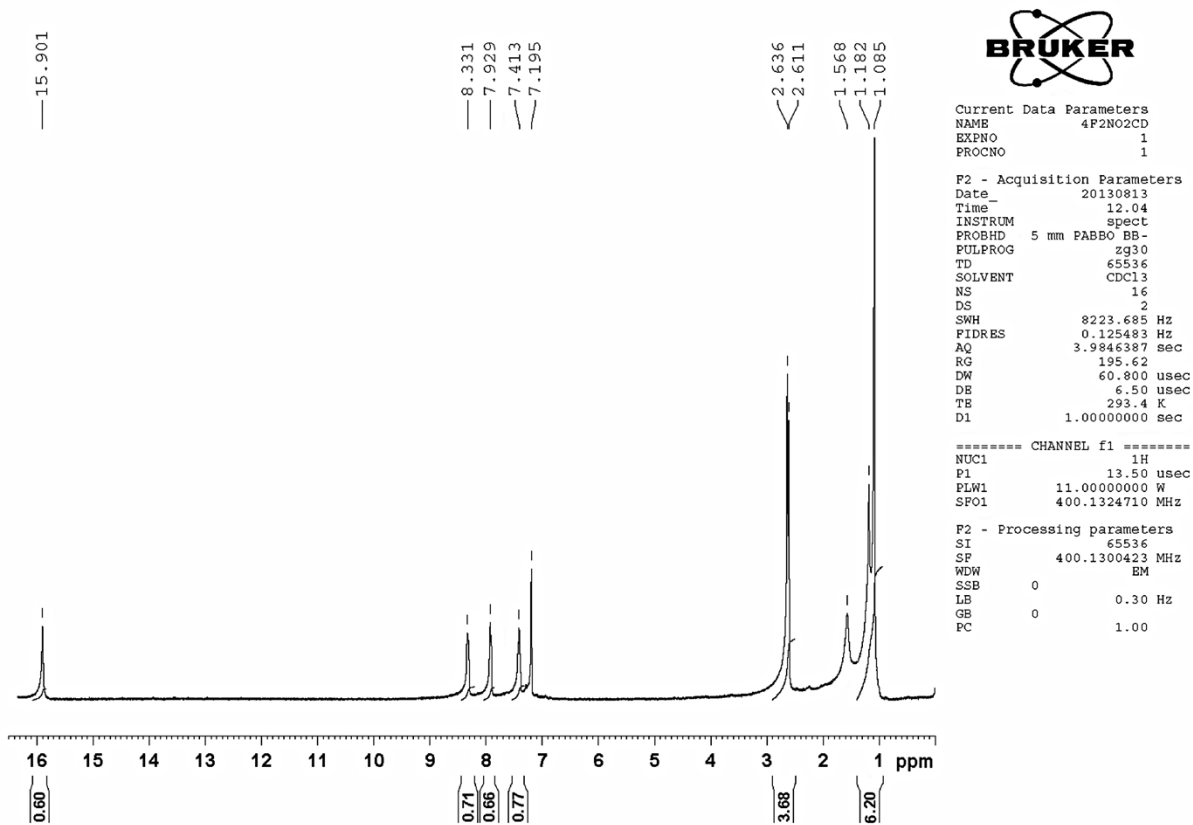

**Fig. S3**  $^1\text{H}$  NMR spectrum of compound **(1)**.

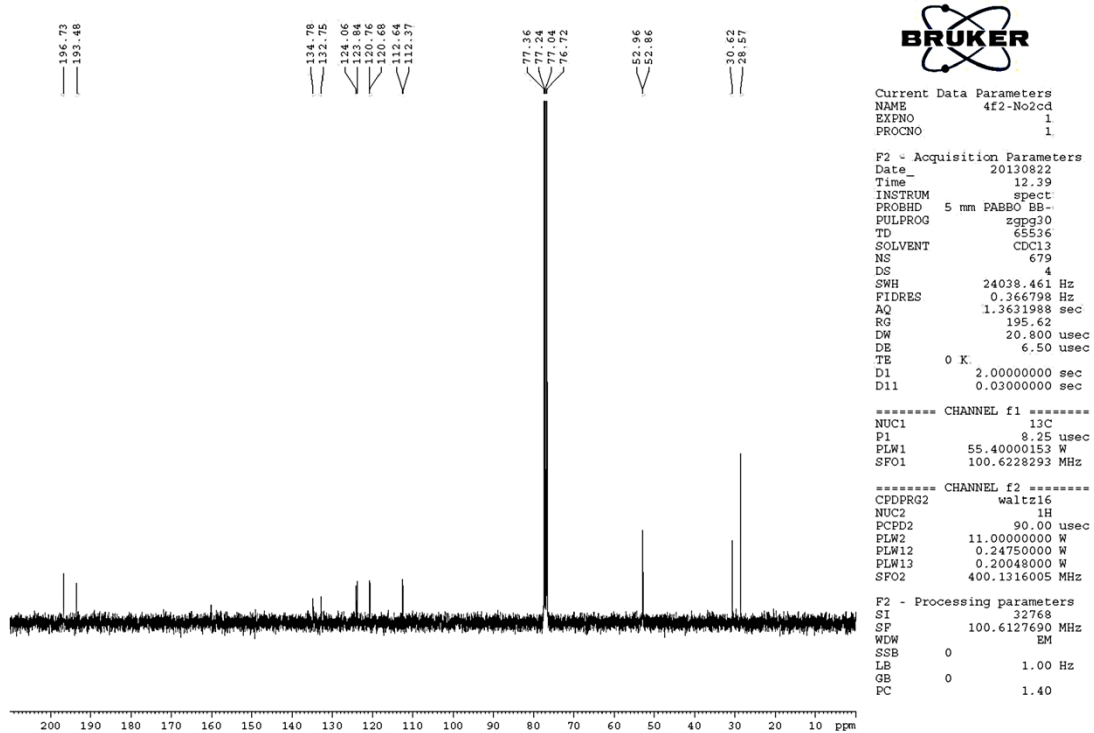

Fig. S4  $^{13}\text{C}$  NMR spectrum of compound (1).

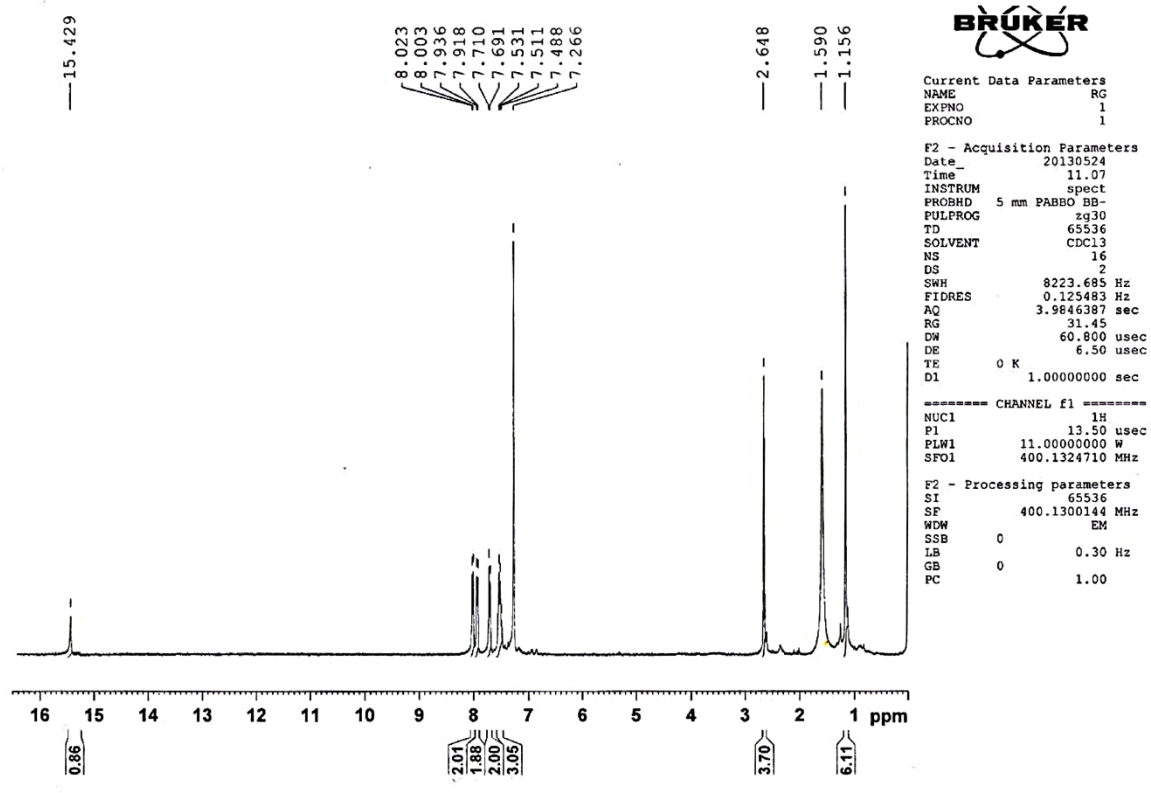

Fig. S5 <sup>1</sup>H NMR spectrum of compound (2).

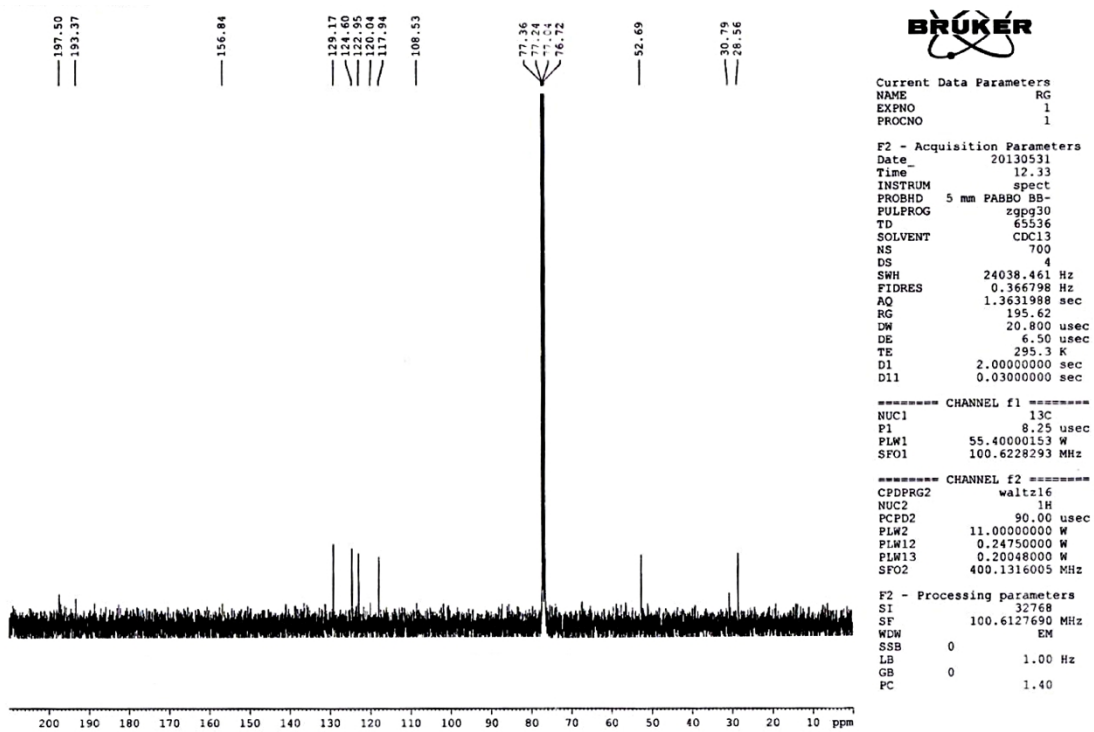

Fig. S6 <sup>13</sup>C NMR spectrum of compound (2).

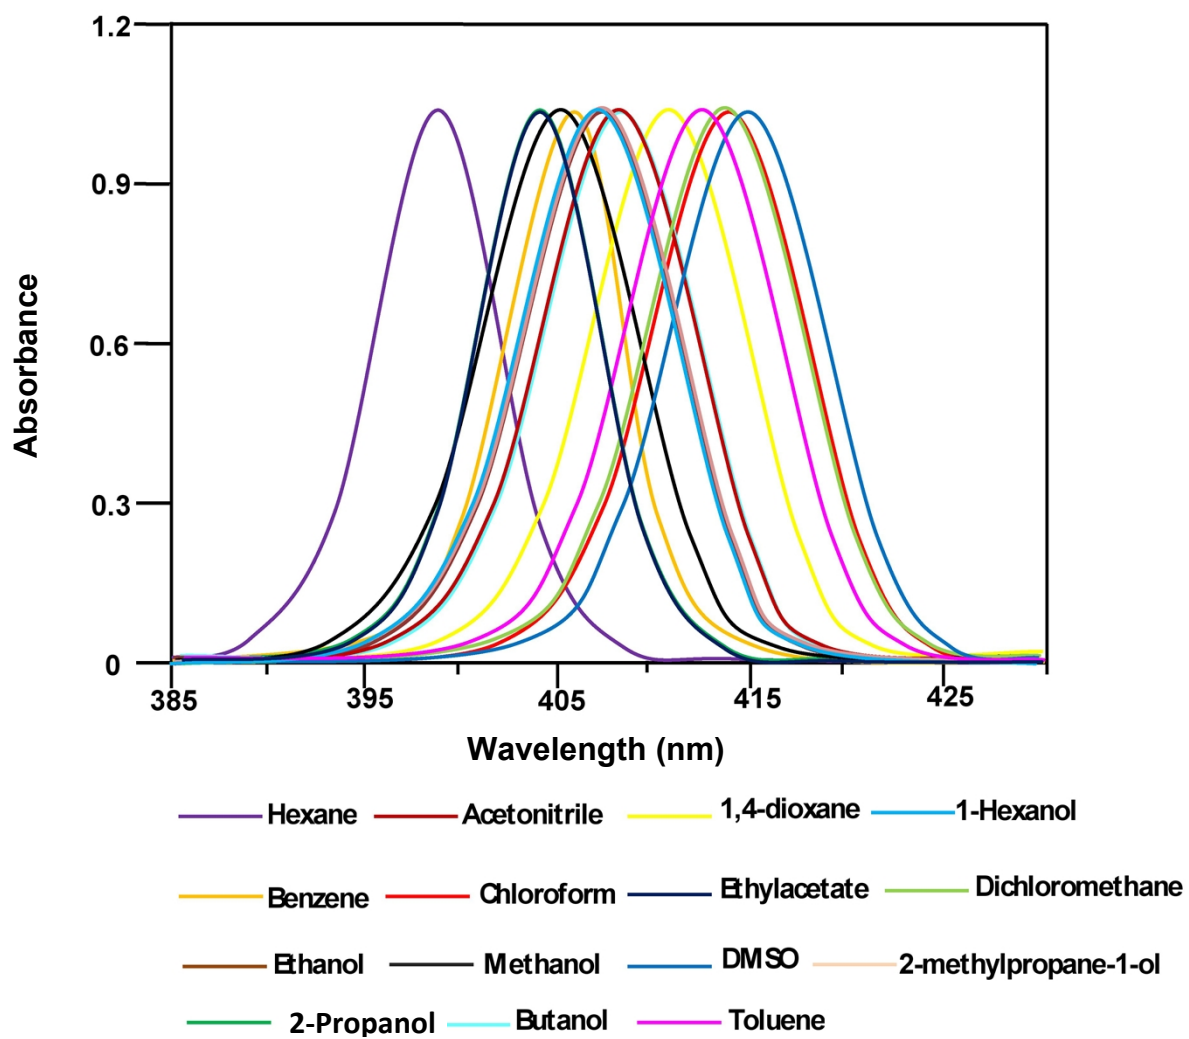

Fig. S7A Absorption spectrum of compound (1).



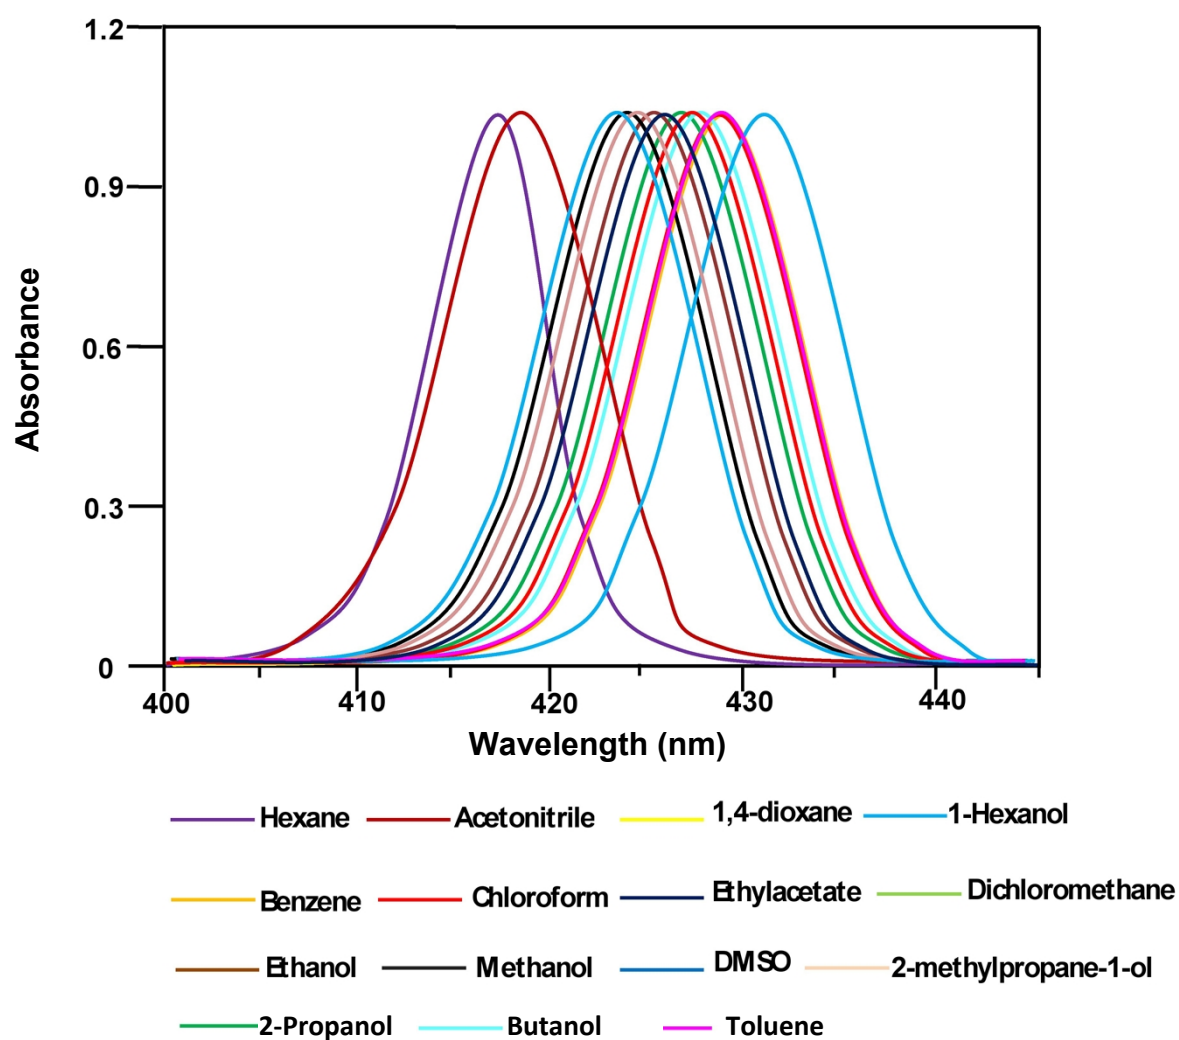

Fig. S7B Absorption spectrum of compound (2).

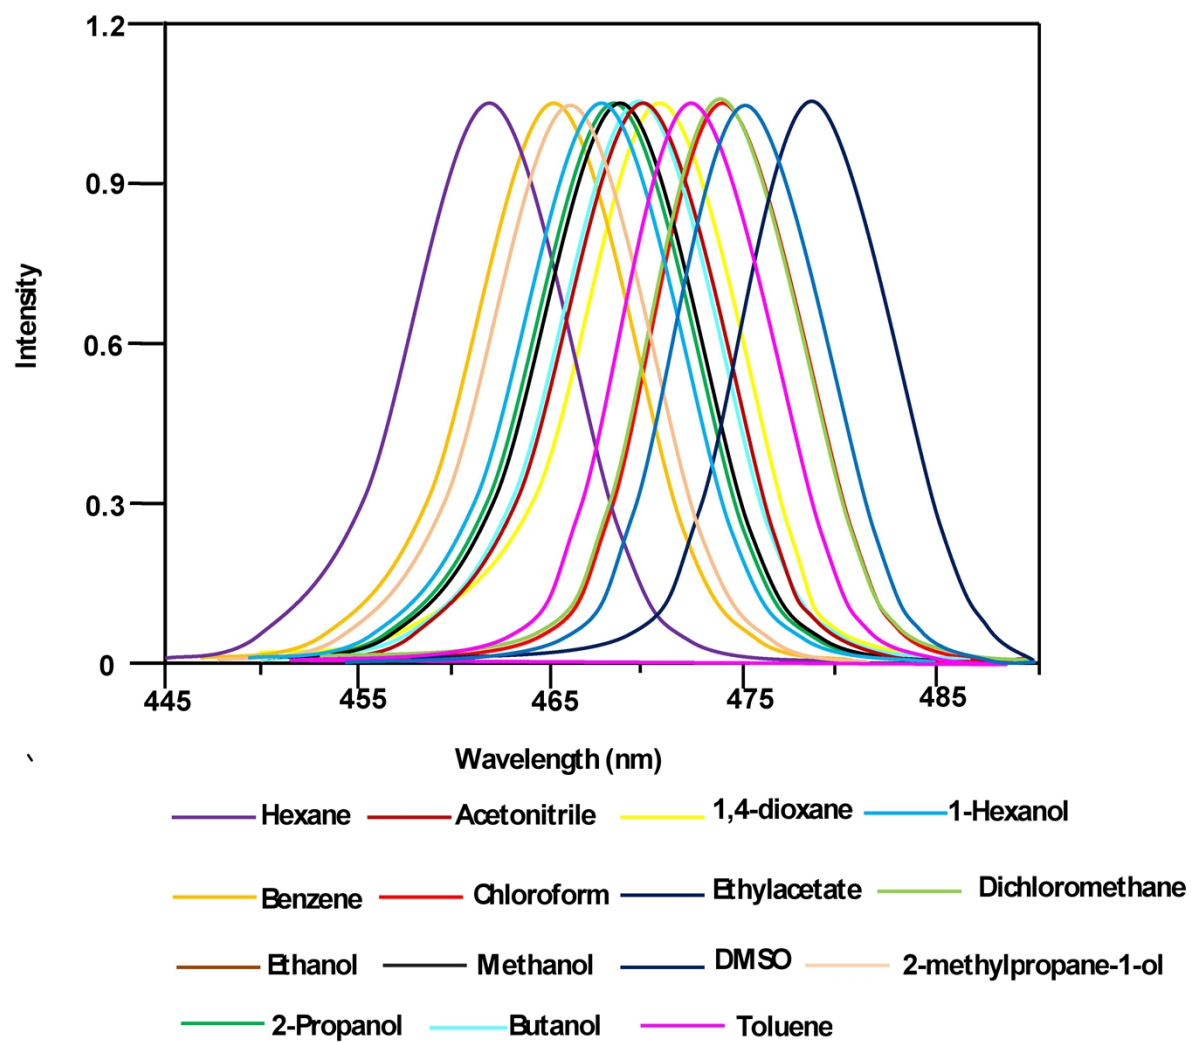

Fig. S8A Emission spectrum of compound (1).

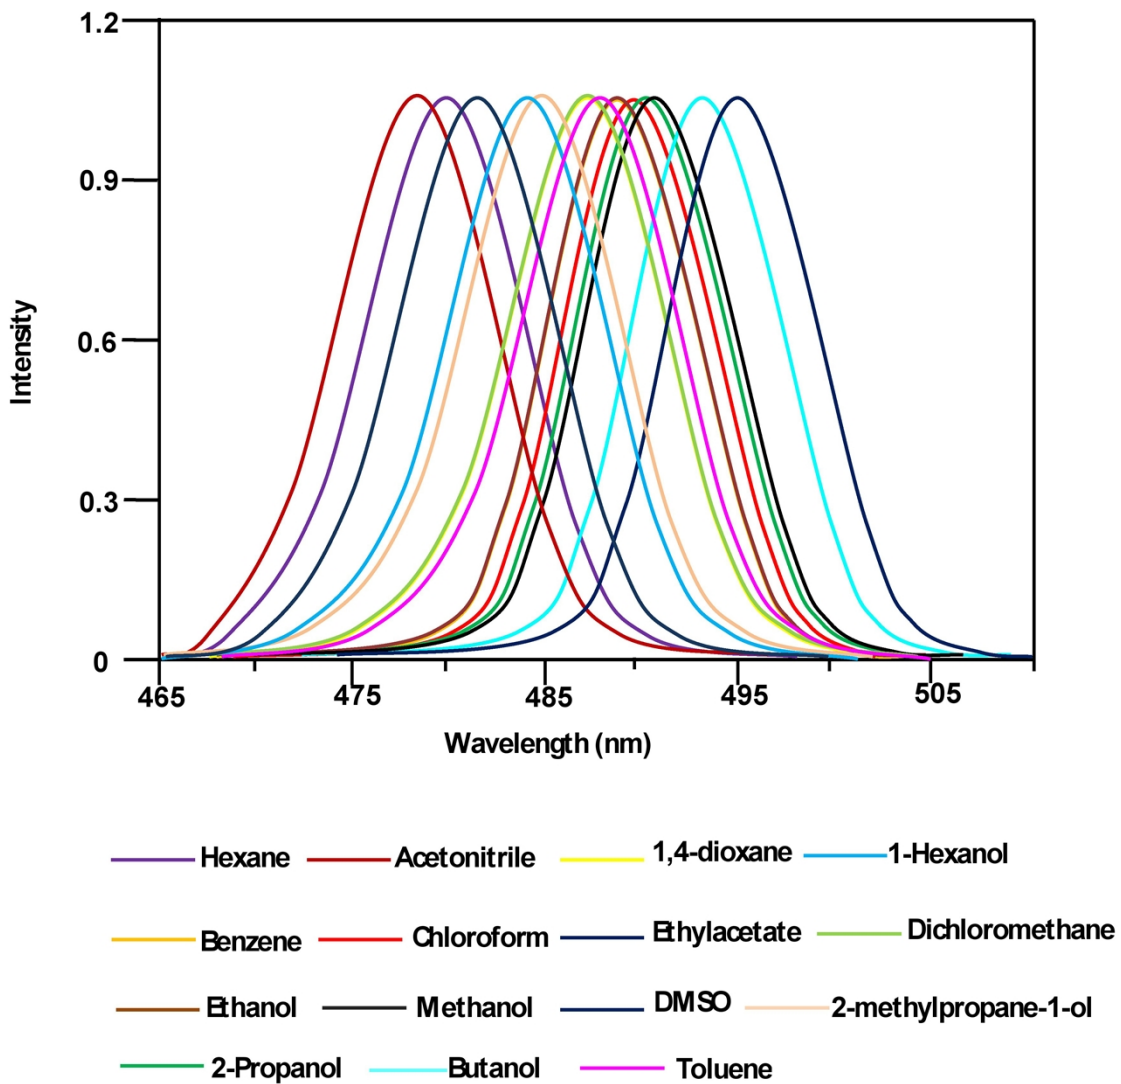

**Fig. S8B** Emission spectrum of compound (2).

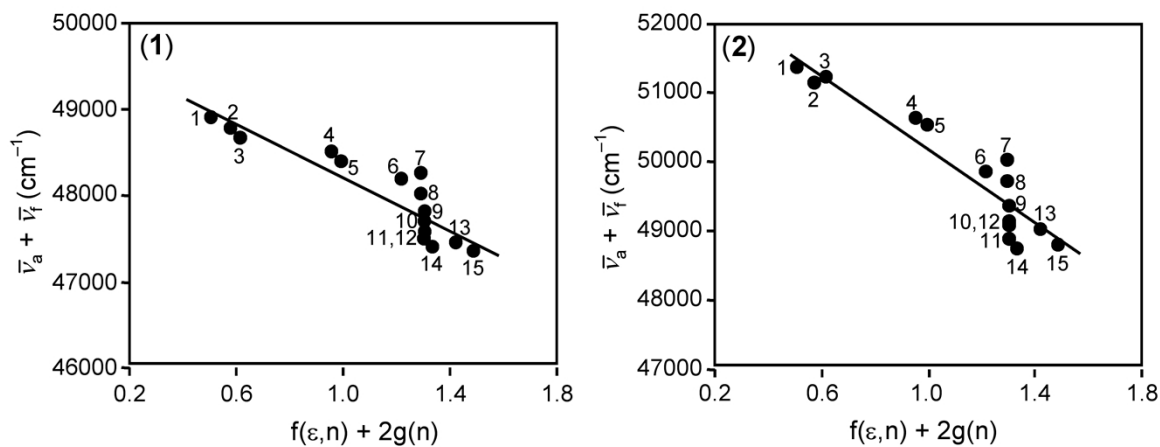

**Fig. S9 Plot of Kawski correlation  $\bar{\nu}_a + \bar{\nu}_f$  (cm<sup>-1</sup>) Vs  $f(\epsilon, n) + 2g(n)$  for compound (1) and (2).** 1. Hexane, 2. 1,4-dioxane, 3. Benzene, 5. Chloroform, 6. Ethylacetate, 7. Ethanol, 8. Methanol, 9. 2-propanol, 11. 1-Butanol, 13. Dichloromethane, 14. Acetonitrile, 15. Dimethylsulfoxide.

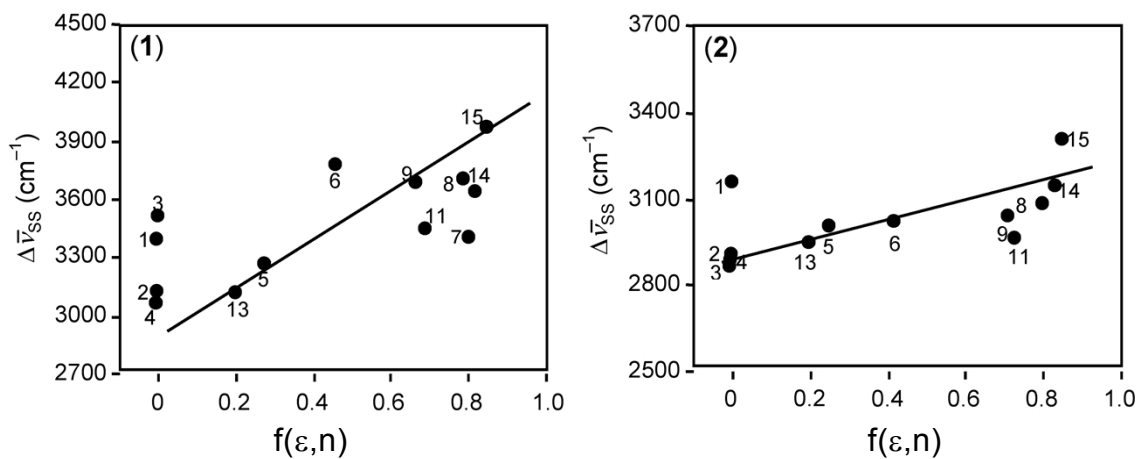

**Fig. S10 Plot of Stokes shifts (cm<sup>-1</sup>) Vs  $f(\epsilon, n)$  for compound (2).** 1. Hexane, 2. 1,4-dioxane, 3. Benzene, 5. Chloroform, 6. Ethylacetate, 7. Ethanol, 8. Methanol, 9. 2-propanol, 11. 1-Butanol, 13. Dichloromethane, 14. Acetonitrile, 15. dimethylsulfoxide.

## Spectroscopic determination of the pka for compounds (1) and (2)<sup>1,2</sup>

Buffer solutions ranging from pH 1-13 were prepared as per standard procedures and standardized by standard pH meter using a glass electrode. Absorbance of compound (1) and these buffer solutions were measured. The absorbance maximum at highest acidic pH 1 is considered as  $\lambda_1$ (acidic). Similarly the absorbance maximum at highest basic pH is pH13 is considered as  $\lambda_2$ (basic). Now the intensities at  $\lambda_1$ (acidic) and  $\lambda_2$ (basic) were determined for all other pH ranges. The values are tabulated in Table S3 and S4. The intensity correction at  $\lambda_1$ (acidic) and  $\lambda_2$ (basic) were done to avoid errors by the following method

**Intensity of corrected absorption at  $\lambda_1$  (acidic) =  $\lambda_1$  intensity observed -  $\lambda_1$  intensity minimum**

Where,  $\lambda_1$  intensity minimum is the minimum intensity for  $\lambda_1$ (acidic).

Similarly corrections are carried out at  $\lambda_2$ (basic) and the values are tabulated.

As we know

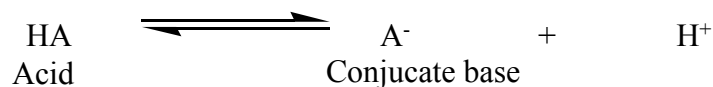

Hendersan-Hasselbach equation for the above reaction

$$\text{pH} = \text{pka} + \log[\text{A}^-]/[\text{HA}]$$

$$\log[\text{A}^-]/[\text{HA}] = \frac{A_{\lambda_2} - A_{\lambda_1 \text{ acidic}}}{A_{\lambda_2 \text{ basic}} - A_{\lambda_1}}$$

Where  $A_{\lambda_2}$  = Corrected  $\lambda_2$  absorption at a particular pH

$A\lambda_1$  = Corrected  $\lambda_1$  absorption at a particular pH

$A\lambda_1$  acidic = Acidic  $\lambda_1$  absorption

$A\lambda_2$  basic = Basic  $\lambda_2$  absorption

At equilibrium **pH = pKa**

A graph is plotted between pH Vs  $\log[A^-]/[HA]$ . From intersection straight line over y axis gives equilibrium pH which is the pKa value.

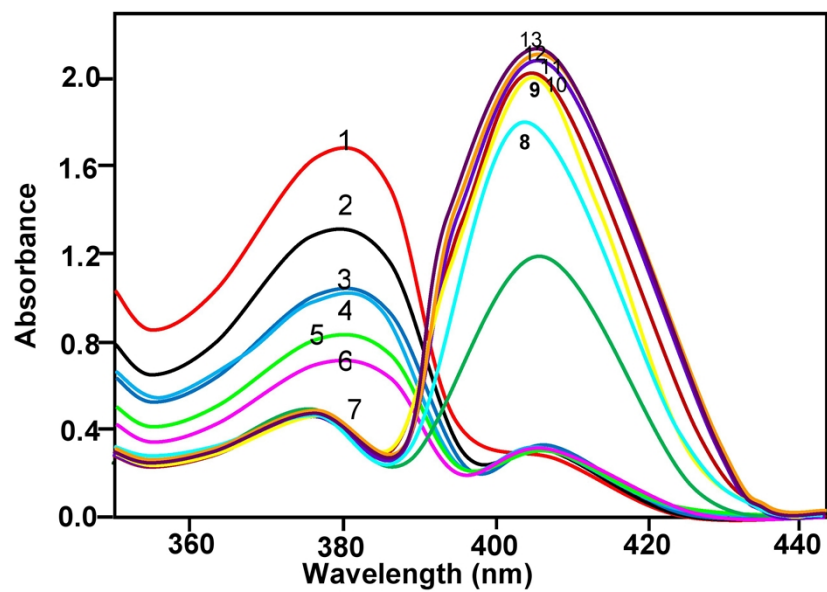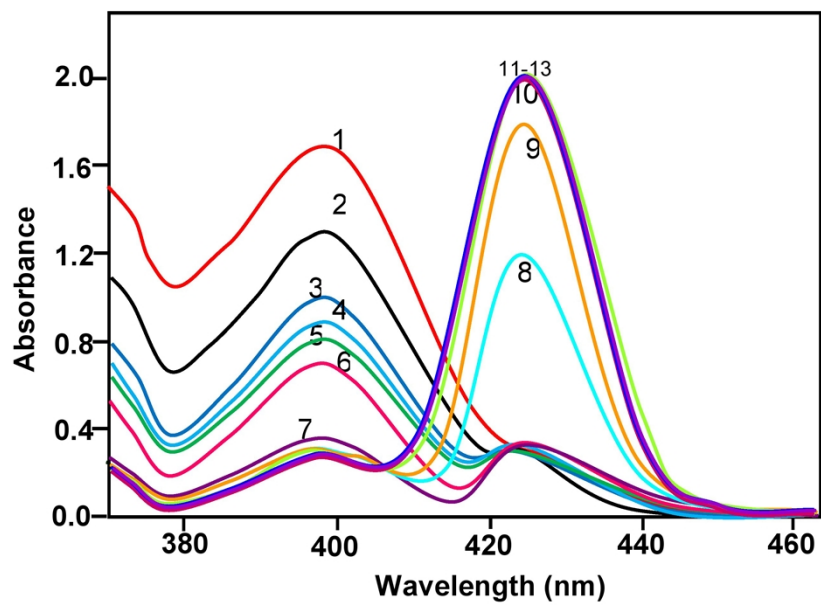

**Fig. S11** A plot of absorbance as a function of pH for compounds (1) and (2)

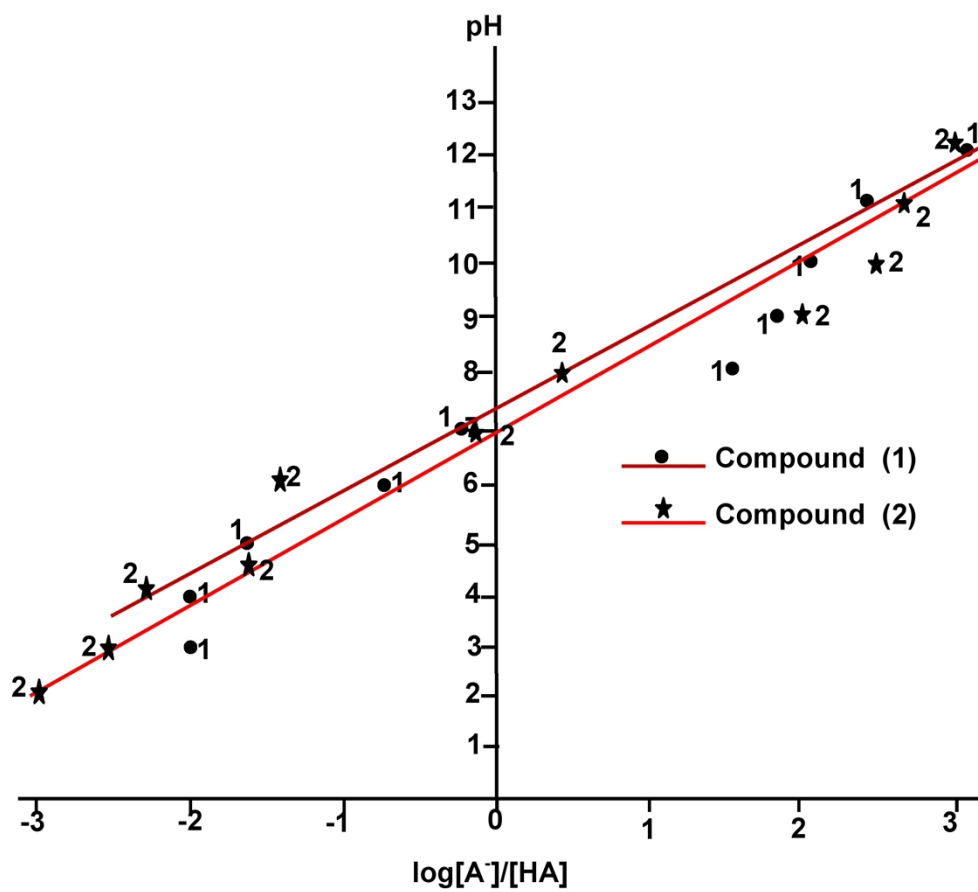

**Fig. S12** Plot of pH as a function of  $\log[A^-]/[HA]$ . The pKa of compounds (1) and (2) corresponds to the intersection of the straight line with the 'y' axis



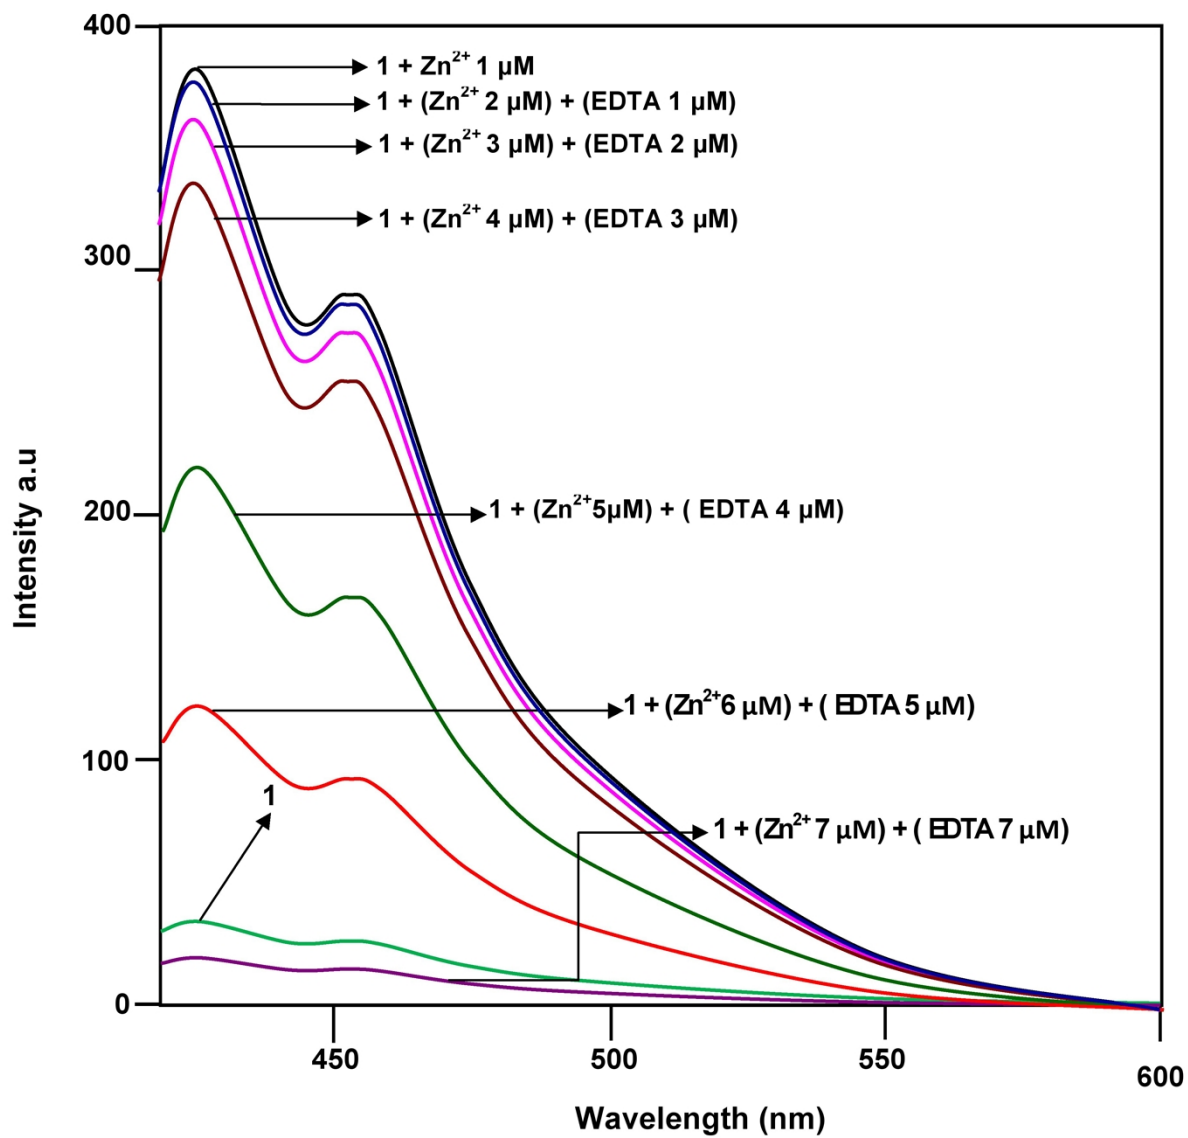

**Fig. S13** Fluorescence spectra of compound (1) with various concentration of Zn<sup>2+</sup> and EDTANa<sub>2</sub> in ethanol solution.

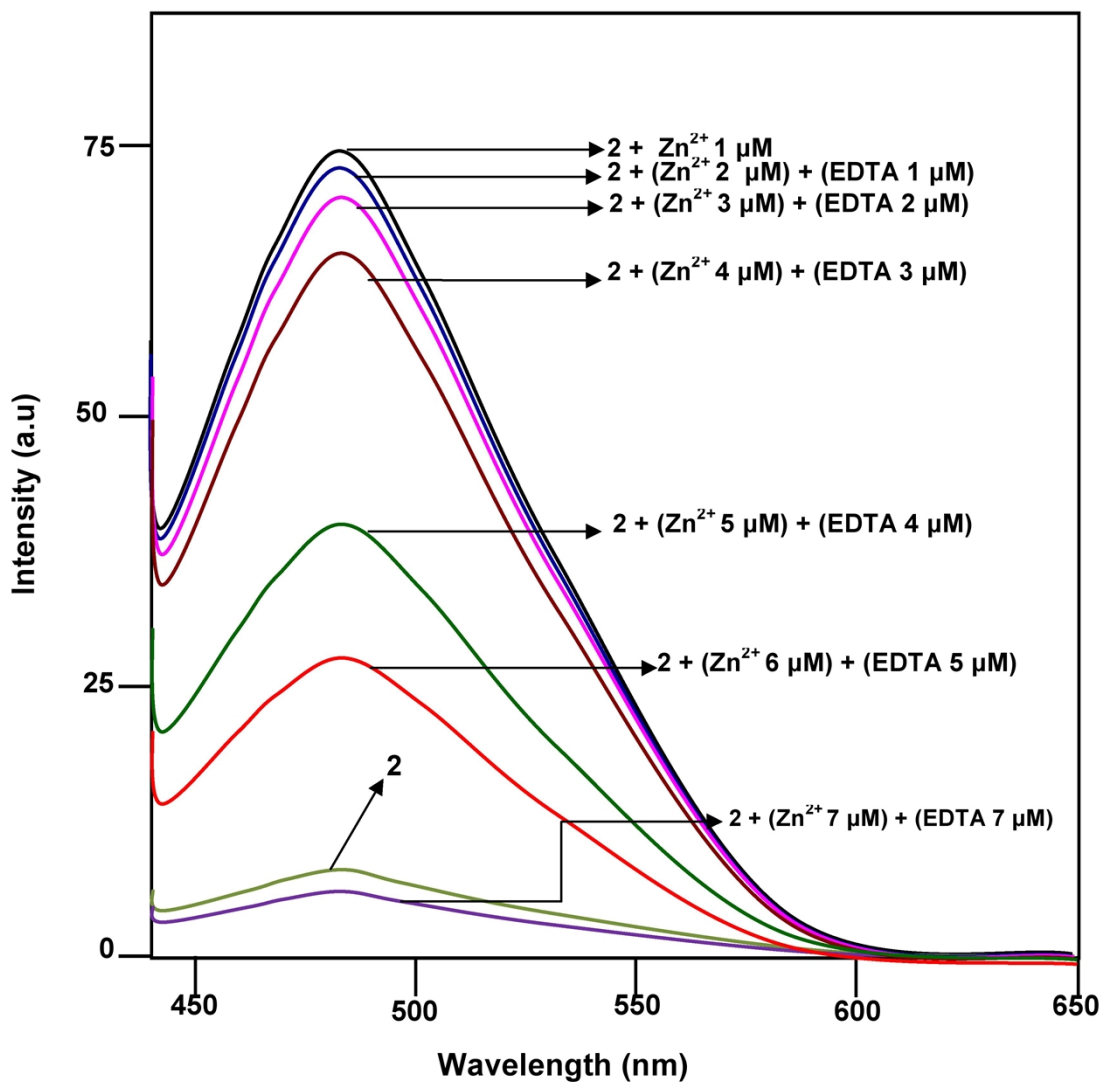

**Fig. S14** Fluorescence spectra of compound (2) with various concentration of Zn<sup>2+</sup> and EDTANa<sub>2</sub> in ethanol solution.

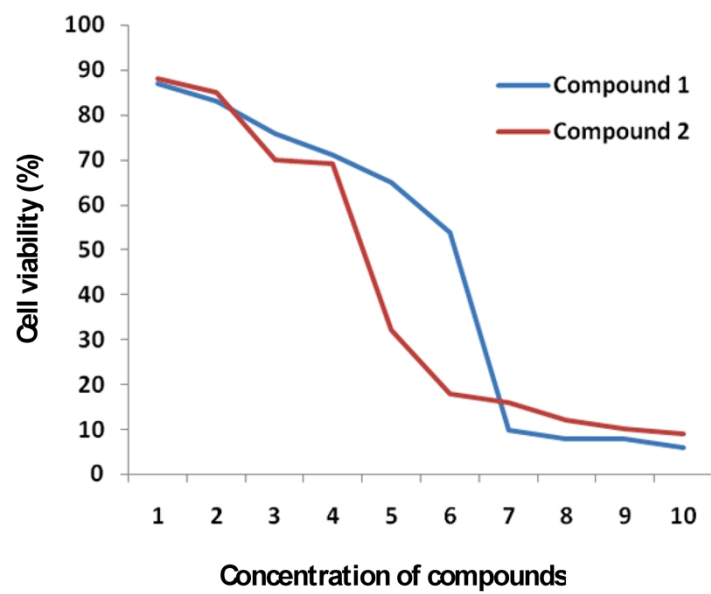

**Fig. S15** Cytotoxic activity of compounds (1) and (2) against KB cell line.

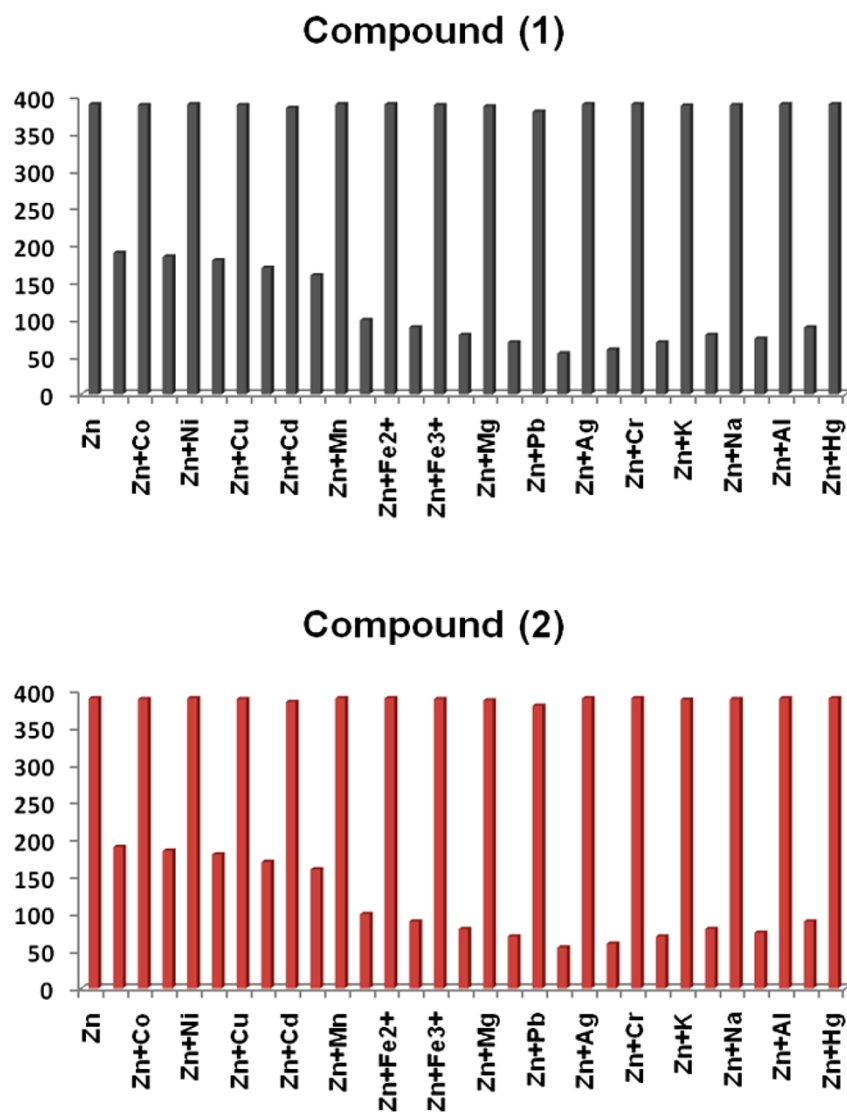

**Fig. S16** Metal-ion selectivity of 1 (top) in 1: 1 v/v 0.01 M CH<sub>3</sub>CH<sub>2</sub>OH-H<sub>2</sub>O, pH 7.0. The SHORT bars represent the fluorescence emission of a solution of compound (1) and (2) (10 mM) and 5 equiv. of other metal ions. The lengthy bars represents the fluorescence emission after the

addition of 1 equiv. of Zn(II) to the solution containing 1 and 2 (10 mM) and different metal ions (50 mM).

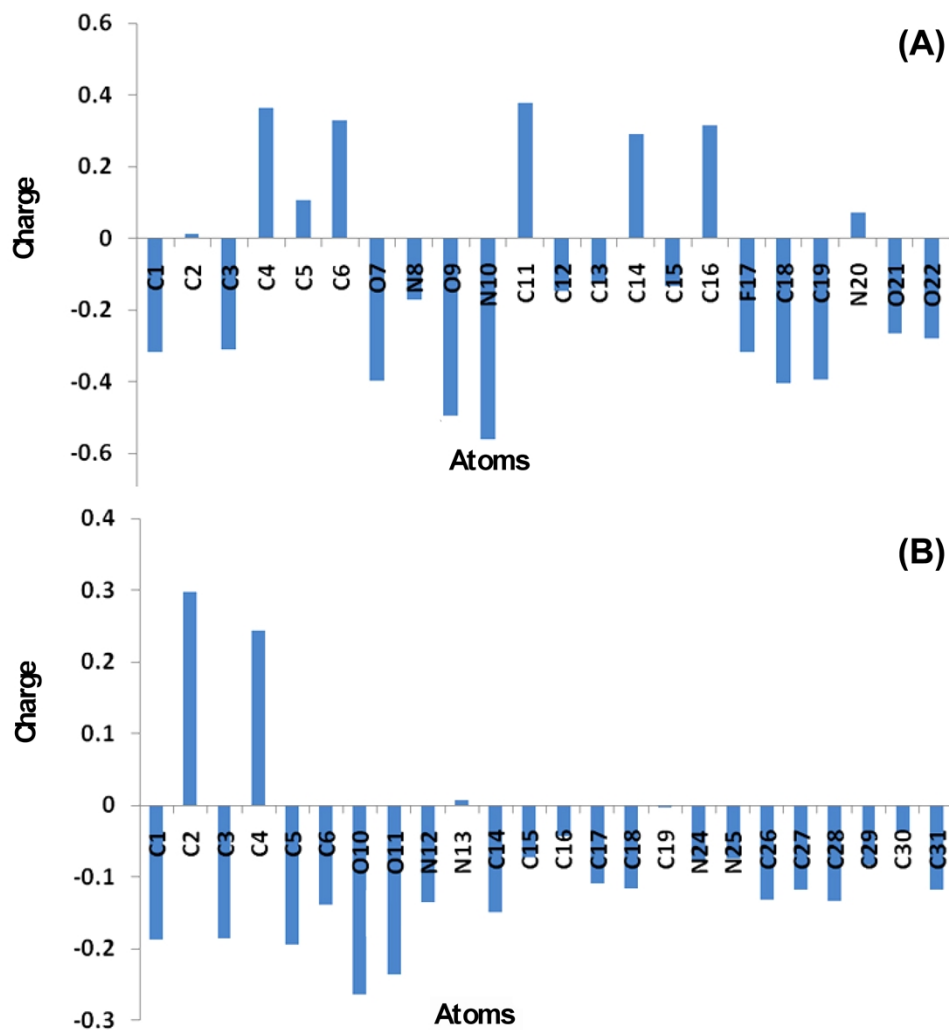

**Fig. S17** Bar diagram of Mulliken atomic charges (A) compound (1) and (B) compound (2).

**Table S1 . Absorbtion and emission values of compound 1 and compound 2**

| <i>Solvent</i>               | <b>Polarity index</b> | <b>1</b>                                        |                                                 | <b>2</b>                                        |                                                 |
|------------------------------|-----------------------|-------------------------------------------------|-------------------------------------------------|-------------------------------------------------|-------------------------------------------------|
|                              |                       | <b><math>\Lambda_{\text{abs}}</math><br/>nm</b> | <b><math>\Lambda_{\text{flu}}</math><br/>nm</b> | <b><math>\Lambda_{\text{abs}}</math><br/>nm</b> | <b><math>\Lambda_{\text{flu}}</math><br/>nm</b> |
| <i>Hexane</i>                | 0                     | 399                                             | 462                                             | 417                                             | 480                                             |
| <i>1,4-dioxane</i>           | 0.2                   | 409                                             | 472                                             | 427                                             | 487                                             |
| <i>1-hexanol</i>             | 0.5                   | 407                                             | 467                                             | 424                                             | 484                                             |
| <i>1-butanol</i>             | 0.6                   | 408                                             | 469                                             | 428                                             | 488                                             |
| <i>Toluene</i>               | 2.4                   | 413                                             | 473                                             | 428                                             | 488                                             |
| <i>Benzene</i>               | 2.7                   | 401                                             | 465                                             | 429                                             | 489                                             |
| <i>Dichloromethane</i>       | 3.1                   | 414                                             | 474                                             | 427                                             | 487                                             |
| <i>2-propanol</i>            | 3.9                   | 404                                             | 468                                             | 426                                             | 486                                             |
| <i>2-methylpropanol-1-ol</i> | 3.9                   | 407                                             | 466                                             | 425                                             | 485                                             |
| <i>Chloroform</i>            | 4.1                   | 414                                             | 474                                             | 429                                             | 490                                             |
| <i>Ethylacetate</i>          | 4.4                   | 404                                             | 475                                             | 422                                             | 482                                             |
| <i>Methanol</i>              | 5.1                   | 405                                             | 468                                             | 424                                             | 491                                             |
| <i>Ethanol</i>               | 5.2                   | 406                                             | 467                                             | 426                                             | 489                                             |
| <i>Acetonitrile</i>          | 5.8                   | 408                                             | 470                                             | 418                                             | 478                                             |
| <i>DMSO</i>                  | 7.2                   | 415                                             | 478                                             | 431                                             | 495                                             |

**Table S2.** The IC50 values of compounds 1 and 2 against KB cell lines.

| <b>Anticancer effect of compounds(1) and (2) on KB cell line</b> |                     |                     |
|------------------------------------------------------------------|---------------------|---------------------|
|                                                                  | <b>Viability %</b>  |                     |
| <b>Concentration (<math>\mu</math>M)</b>                         | <b>Compound (1)</b> | <b>Compound (2)</b> |
| 1.5                                                              | 87                  | 88                  |
| 2                                                                | 83                  | 85                  |
| 3.8                                                              | 76                  | 70                  |
| 7.6                                                              | 71                  | 69                  |
| 15.3                                                             | 65                  | 32                  |
| 30.6                                                             | 54                  | 18                  |
| 61.25                                                            | 10                  | 16                  |
| 125                                                              | 8                   | 12                  |
| 250                                                              | 8                   | 10                  |
| 500                                                              | 6                   | 9                   |

**Table S3.** Intensities and corrected intensities for  $\lambda$  acidic and  $\lambda$  basic for compound **(1)**

| <b>Compound (1)</b> |                                                            |                                    |                                                           |                                    |                             |                                |
|---------------------|------------------------------------------------------------|------------------------------------|-----------------------------------------------------------|------------------------------------|-----------------------------|--------------------------------|
| <b>pH</b>           | <b>Observed Intensity of <math>\lambda_1</math> acidic</b> | <b>Corrected intensity of acid</b> | <b>Observed Intensity of <math>\lambda_2</math> basic</b> | <b>Corrected intensity of base</b> | <b>[A<sup>-</sup>]/[HA]</b> | <b>log[A<sup>-</sup>]/[HA]</b> |
| 1                   | 1.698                                                      |                                    | 0.291                                                     | 0                                  | 0                           | 0                              |
| 2                   | 1.344                                                      | 1.267                              | 0.292                                                     | 0.001                              | 0.000746                    | -3.12721                       |
| 3                   | 1.038                                                      | 0.913                              | 0.296                                                     | 0.005                              | 0.005611                    | -2.25096                       |
| 4                   | 1.014                                                      | 0.607                              | 0.296                                                     | 0.005                              | 0.005842                    | -2.23343                       |
| 5                   | 0.833                                                      | 0.583                              | 0.301                                                     | 0.01                               | 0.016945                    | -1.77096                       |
| 6                   | 0.765                                                      | 0.402                              | 0.355                                                     | 0.064                              | 0.130526                    | -0.8843                        |
| 7                   | 0.5                                                        | 0.334                              | 1.201                                                     | 0.068                              | 0.671311                    | -0.17308                       |
| 8                   | 0.458                                                      | 0.069                              | 1.868                                                     | 1.577                              | 39.78612                    | 1.599732                       |
| 9                   | 0.445                                                      | 0.027                              | 2.03                                                      | 1.739                              | 84.61263                    | 1.927435                       |
| 10                  | 0.44                                                       | 0.014                              | 2.07                                                      | 1.779                              | 134.6471                    | 2.129197                       |
| 11                  | 0.435                                                      | 0.009                              | 2.121                                                     | 1.83                               | 311.6411                    | 2.493655                       |
| 12                  | 0.432                                                      | 0.004                              | 2.142                                                     | 1.851                              | 1260.869                    | 3.10067                        |
| 13                  | 0.431                                                      | 0.001                              | 2.151                                                     | 1.86                               | 0                           |                                |
|                     |                                                            | <b><math>\lambda_1=380</math></b>  |                                                           | <b><math>\lambda_2=406</math></b>  |                             |                                |



**Table S4.** Intensities and corrected intensities for  $\lambda$  acidic and  $\lambda$  basic for compound (2)

| Compound (2) |                                          |                             |                                         |                             |                        |                           |
|--------------|------------------------------------------|-----------------------------|-----------------------------------------|-----------------------------|------------------------|---------------------------|
| pH           | Observed Intensity of $\lambda_1$ acidic | Corrected intensity of acid | Observed Intensity of $\lambda_2$ basic | Corrected intensity of base | [A <sup>-</sup> ]/[HA] | log[A <sup>-</sup> ]/[HA] |
| 1            | 1.692                                    | 1.349                       | 0.326                                   | 0                           | 0                      |                           |
| 2            | 1.354                                    | 1.011                       | 0.327                                   | 0.001                       | 0.000674               | -3.17149                  |
| 3            | 1.01                                     | 0.667                       | 0.328                                   | 0.002                       | 0.002043               | -2.68983                  |
| 4            | 0.99                                     | 0.647                       | 0.331                                   | 0.005                       | 0.005264               | -2.27867                  |
| 5            | 0.794                                    | 0.451                       | 0.34                                    | 0.014                       | 0.021145               | -1.67478                  |
| 6            | 0.75                                     | 0.407                       | 0.349                                   | 0.023                       | 0.038494               | -1.4146                   |
| 7            | 0.382                                    | 0.039                       | 0.37                                    | 0.044                       | 0.768514               | -0.11435                  |
| 8            | 0.369                                    | 0.026                       | 1.208                                   | 0.882                       | 23.10782               | 1.363759                  |
| 9            | 0.352                                    | 0.009                       | 1.864                                   | 1.538                       | 116.4066               | 2.065977                  |
| 10           | 0.346                                    | 0.003                       | 2.008                                   | 1.682                       | 381.9165               | 2.581968                  |
| 11           | 0.345                                    | 0.002                       | 2.02                                    | 1.694                       | 576.9618               | 2.761147                  |
| 12           | 0.344                                    | 0.001                       | 2.027                                   | 1.701                       | 1158.692               | 3.063968                  |
| 13           | 0.343                                    | 0                           | 2.066                                   | 1.74                        |                        |                           |
|              |                                          | $\lambda_1=399$             |                                         | $\lambda_2=425$             |                        |                           |

## References

- 1 R. D. Barun, Introduction to chemical Analysis; Mc Graw-Hill, New York, 1982, 197- 199
- 2 G. H. Jeffery, H. Bassett, J. Mendam, R.C. Denny, “ Vogel’s Text books of quantitative chemical Analysis Ed. 5, 1989, 46-49
